# Supplementary material for: The meaning of labour pain: how the social environment and other contextual factors shape women’s experiences
Source: Springer Nature journal article supplement (doi:10.1186/s12884-017-1343-3), 2017-05-30
Supplement: MOESM1 [file 12326416]

**RESEARCH NUMBER**

## Interview Guide – Post-birth

**RESEARCHERS**

Prof Rhonda Small (Judith Lumley Centre)  
Dr Mary-Ann Davey (Judith Lumley Centre)  
Mr Lester Jones (Department of Physiotherapy)  
Ms Laura Whitburn (Judith Lumley Centre)

## Post-birth interview questions/guide

### Part 1 – Labour time-line

Based on the medical notes, or in discussion with participant, outline the labour by creating a time line.

- Note length of labour
- Add to timeline major events e.g. changes in location, changes in caregivers, interventions, other significant events
- Note method of delivery

## Post-birth interview questions/guide

### Part 2 – Pain during labour

- For each part of the labour (using events identified above) describe your labour pain experience

#### **PERIOD 1:**

Description of pain- thoughts/emotions/intensity

Meaning of the pain

Contextual influences

Social environment influences

Mindset - focussed/distracted

Interruptions?

To labour

To focus

#### **PERIOD 2:**

Description of pain- thoughts/emotions/intensity

Meaning of the pain

Contextual influences

Social environment influences

Mindset - focussed/distracted

Interruptions?

To labour

To focus

## Post-birth interview questions/guide

### **PERIOD 3:**

Description of pain- thoughts/emotions/intensity

Meaning of the pain

Contextual influences

Social environment influences

Mindset - focussed/distracted

Interruptions?

To labour

To focus

### **PERIOD 4:**

Description of pain- thoughts/emotions/intensity

Meaning of the pain

Contextual influences

Social environment influences

Mindset - focussed/distracted

Interruptions?

To labour

To focus

## Post-birth interview questions/guide

### **PERIOD 5:**

Description of pain- thoughts/emotions/intensity

Meaning of the pain

Contextual influences

Social environment influences

Mindset - focussed/distracted

Interruptions?

To labour

To focus

## Post-birth interview questions/guide

### Part 2 – Overall impression of labour pain

What was your overall impression of labour pain? Compared to expectations?

Was it better/worse/as expected? What about it made it better/worse than expected?

What do you think influences labour pain? What makes it better/worse?

Effect of thoughts/mindset on labour pain?

Effect of people on labour pain?

Is there anything you wished was different about the labour pain?
